# Supplementary material
Source: Springer Nature journal article supplement (https://www.springermedizin.de/resource/supplementary/13058_2010_9519_MOESM2_ESM.pdf/9702330)
Supplement: MOESM2 [file 9702330]

■ Test ■ Training ■ Evaluation ■ Learning

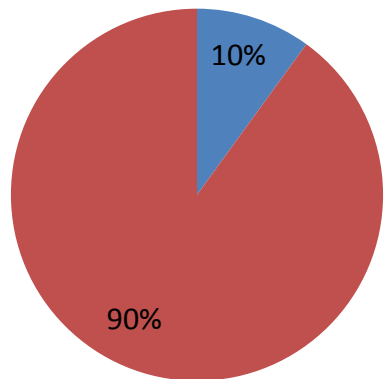

x 1000

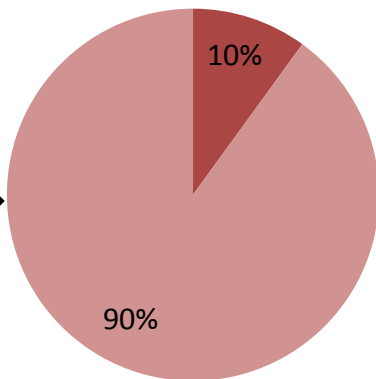

Average PE

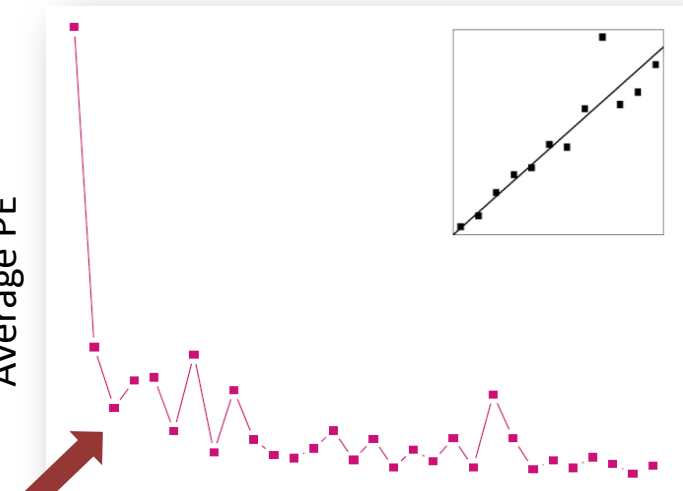

Number of Fields Sampled (FOVs)

x 10

Average PE

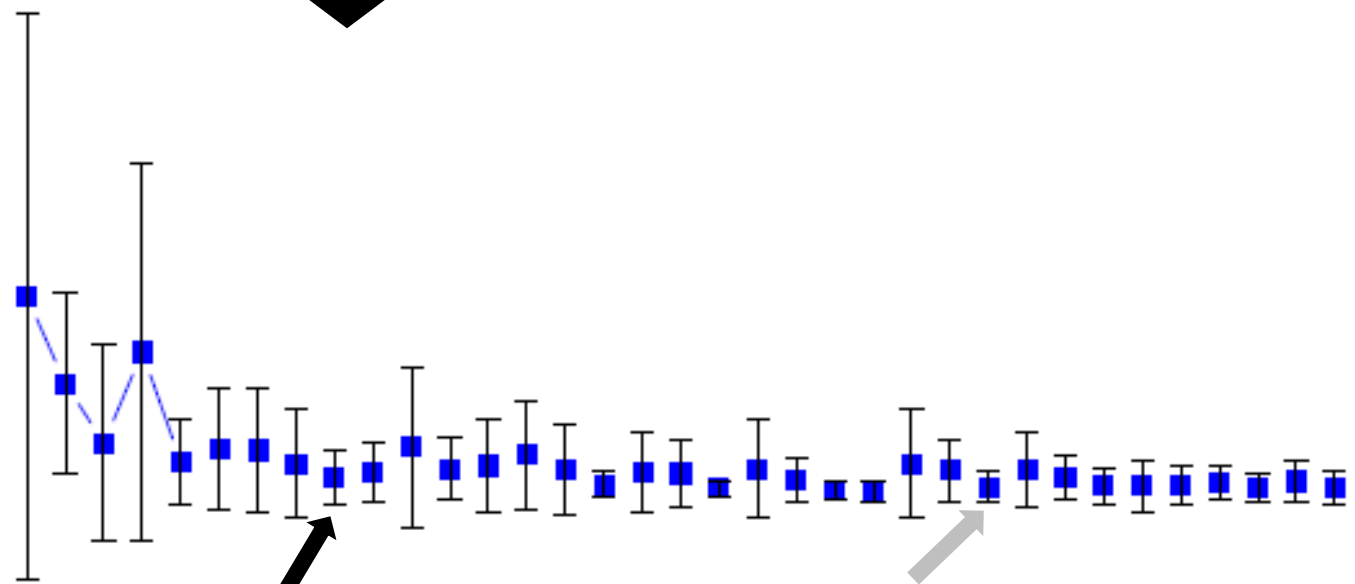

Number of Fields Sampled (FOVs)
